# Supplementary material for: Progerin Expression Induces Inflammation, Oxidative Stress and Senescence in Human Coronary Endothelial Cells
Source: MDPI journal article supplement (doi:10.3390/cells9051201), 2020-05-12
Supplement: s1 [file s1]

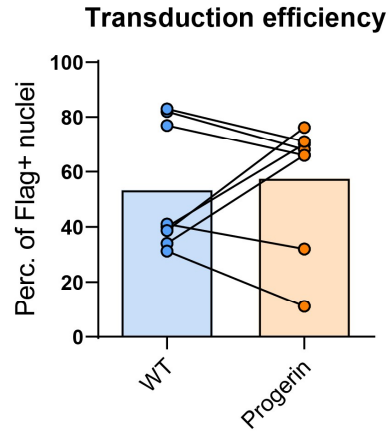

**Supplemental Figure S1.** Transduction efficiency assessed by the number of Flag-positive cells. Early-confluent HCAECs were transduced with Flag-tagged recombinant adenovirus containing WT-prelamin A (WT) or progerin (Prog) for 72 h. The transduction efficiency was determined by the percentage of Flag-positive cells as assessed by fluorescence microscopy. Values for each experiment (represented by symbols linked by a line) are presented. Comparison of the transduction efficiency between experiments found no difference ( $p = 0.6424$  for paired Student t-test analysis).

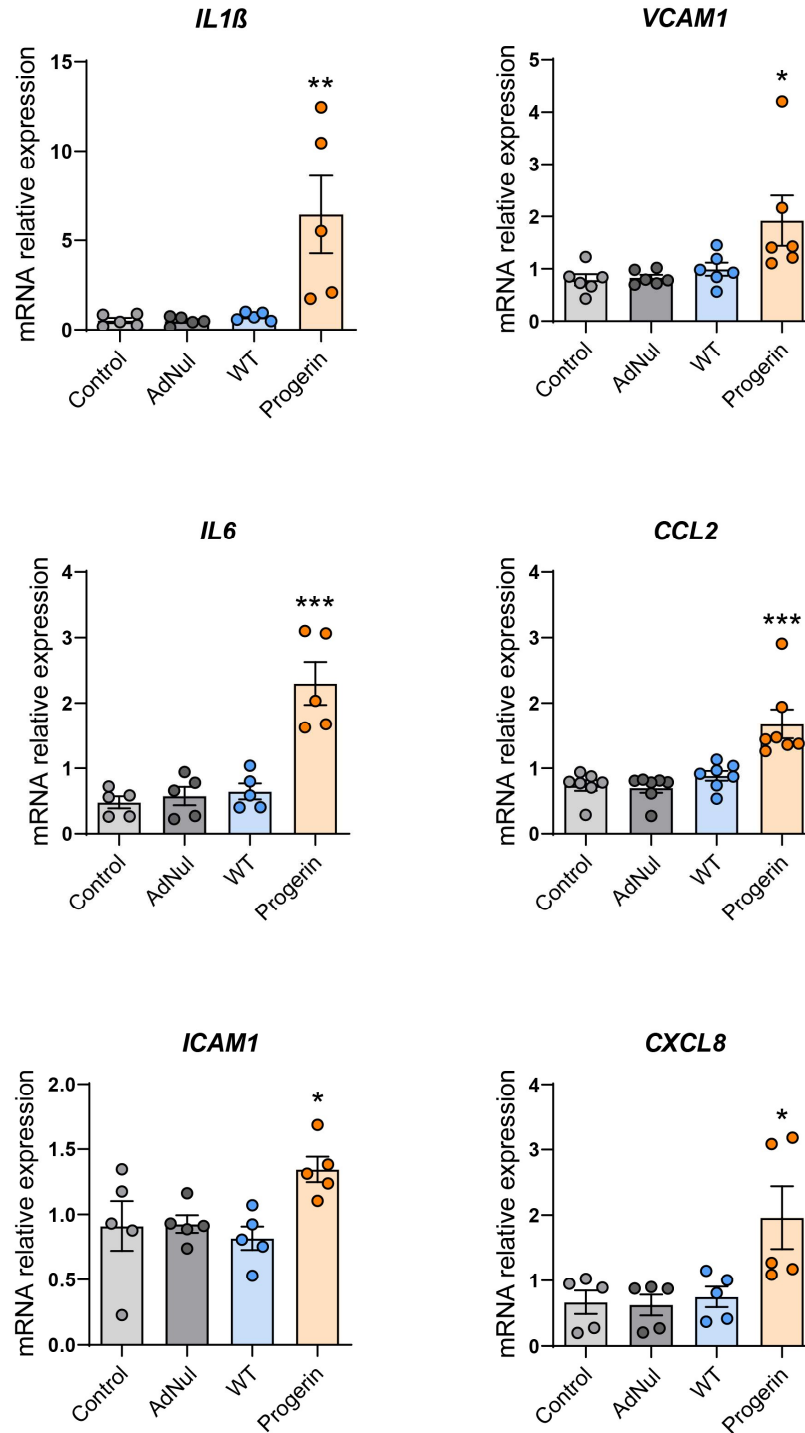

**Supplemental Figure S2.** mRNA expression of proinflammatory markers and cell adhesion molecules in HCAECs. Early-confluent HCAECs were transduced or not (Control) with Flag-tagged recombinant adenovirus containing WT-prelamin A (WT) or progerin for 72 h or with an empty vector (AdNul). Relative mRNA expression is expressed as mean  $\pm$  SEM. Statistical difference was determined using ANOVA followed by a Dunnett post hoc test. \*  $p < 0.05$ , \*\*  $p < 0.01$ , \*\*\*  $p < 0.001$  vs. WT.

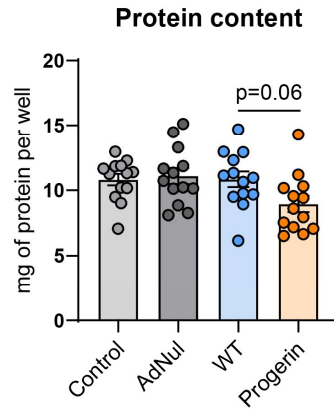

**Supplemental Figure S3.** Protein content per well (6-wells plate) in control and transfected HCAECs in all comparable experiments. Early-confluent HCAECs were transduced or not (Control) with Flag-tagged recombinant adenovirus containing WT-prelamin A (WT) or progerin for 72 h or with an empty vector (AdNul). Data are expressed as mean  $\pm$  SEM. Statistical difference was determined using ANOVA followed by a Dunnett post hoc test. There was no differences in each well protein content under the different conditions compared to WT although a trend towards a decreased protein content was observed upon progerin expression.
